## 2-Arachidonoylglycerol mobilization following brief synaptic stimulation in the dorsal lateral striatum requires glutamatergic and cholinergic neurotransmission

Daniel J. Liput<sup>1,2</sup>, Henry L. Puhl<sup>1</sup>, Ao Dong<sup>3-5</sup>, Kaikai He<sup>3,4</sup>, Yulong Li<sup>3-6</sup>, David M. Lovinger<sup>2</sup>

<sup>1</sup>Laboratory of Molecular Physiology and <sup>2</sup>Laboratory for Integrative Neuroscience, National Institute on Alcohol Abuse and Alcoholism, National Institutes of Health, Maryland, USA

<sup>3</sup>State Key Laboratory of Membrane Biology, Peking University School of Life Sciences, Beijing, China.

<sup>4</sup>PKU-IDG/McGovern Institute for Brain Research, Beijing, China.

<sup>5</sup>Peking-Tsinghua Center for Life Sciences, Beijing, China.

<sup>6</sup>Chinese Institute for Brain Research, Beijing, China

### Abstract

Several forms of endocannabinoid (eCB) signaling have been described in the dorsal lateral striatum (DLS), however most experimental protocols used to induce plasticity do not recapitulate the firing patterns of striatal-projecting pyramidal neurons in the cortex or firing patterns of striatal medium spiny neurons. Therefore, it is unclear if current models of eCB signaling in the DLS provide a reliable description of mechanisms engaged under physiological conditions. To address this uncertainty, we investigated mechanisms of eCB mobilization following brief synaptic stimulation that mimics *in vivo* patterns of neural activity in the DLS. To monitor eCB mobilization, the novel genetically encoded fluorescent eCB biosensor, GRAB<sub>eCB2.0</sub>, was expressed in corticostriatal afferents of C57BL6J mice and evoked eCB transients were measured in the DLS using a brain slice photometry technique. We found that brief bouts of synaptic stimulation induce long lasting eCB transients. Inhibition of monoacylglycerol lipase, prolonged the duration of the eCB transient, while inhibition of diacylglycerol lipase inhibited the peak amplitude, suggesting that 2-AG is the predominate eCB generated following brief synaptic stimulation. 2-AG transients were robustly inhibited by AMPA and NMDA receptor antagonists, DNQX and DL-AP5 respectively. Additionally, the 2-

30 AG transient was inhibited by the muscarinic M1 receptor (M1R) antagonist, VU  
31 0255035, and augmented by the M1R positive allosteric modulator, VU 0486846,  
32 indicating that acetylcholine (ACh) release is required for efficient 2-AG production. The  
33 dopamine D2 receptor (D2R) agonist, quinpirole, inhibited the 2-AG transient. However,  
34 in slices from mice lacking D2Rs on cholinergic interneurons (CINs), quinpirole did not  
35 inhibit the 2-AG transient, demonstrating that D2Rs on CINs can modulate 2-AG  
36 production. The AMPA receptor or NMDA receptor antagonists, DNQX or DL-AP5  
37 respectively, occluded 2-AG augmentation by VU 0486846 suggesting that converging  
38 glutamatergic and cholinergic signals are required for efficient 2-AG production following  
39 brief synaptic stimulation. Collectively, these data uncover unrecognized mechanisms  
40 underlying 2-AG mobilization in the DLS.

41

## 42 **Introduction**

43 The endocannabinoids (eCBs) are lipid-derived signaling molecules that play a  
44 major role in synaptic modulation in the central nervous system (CNS). Unlike traditional  
45 neurotransmitters that are released from presynaptic vesicles, the eCBs are produced  
46 via enzymatic catalysis of arachidonate-containing precursor phospholipids in the  
47 plasma membrane (Ueda et al., 2013) and subsequently released from cells via a non-  
48 vesicular mechanism (Wilson and Nicoll, 2001). In the most common scenario, lipid  
49 metabolism occurs in the postsynaptic membrane and the eCBs traverse the synaptic  
50 cleft to stimulate CB1 receptors (CB1R) on presynaptic terminals, leading to inhibition of  
51 neurotransmitter release (Kano, 2014; Kreitzer and Regehr, 2001; Lovinger, 2008;

52 Ohno-Shosaku et al., 2001; Wilson and Nicoll, 2001). The predominant mobilization  
53 mechanism for the two main eCBs, 2-arachidonoylglycerol (2-AG) and  
54 arachidonylethanolamide (Anandamide, AEA), is production and release “on demand”  
55 in response to membrane depolarization and subsequent  $\text{Ca}^{2+}$  influx, and/or activation  
56 of  $\text{G}\alpha_{q/11}$  by g-protein coupled receptors (GPCRs). Indeed, these biochemical  
57 mechanisms underlie several forms of eCB-dependent synaptic modulation including  
58 short-term depression (STD) and long-term depression (LTD) at glutamatergic and  
59 GABAergic synapses. However, there is also evidence for tonic eCB production and  
60 signaling (Lee et al., 2010; Lee et al., 2015; Neu et al., 2007; Wilson and Nicoll, 2001).

61         The kinetics of eCB signaling have not been measured directly on time scales  
62 supporting synaptic modulation, but estimates have been proposed based on the onset  
63 and decay of eCB-dependent STD (Heinbockel et al., 2005). This measure involves not  
64 only the kinetics of extracellular eCB increases, but also the timing of receptor activation  
65 and presynaptic effector changes. Furthermore, although these estimates may be  
66 accurate for depolarization-induced suppression of inhibition (DSI) and other types of  
67 STD, the timing and magnitude of eCB signaling may not be universal for all forms of  
68 eCB-dependent plasticity and may not be the same for 2-AG and AEA. Additionally, the  
69 kinetics of eCB signaling and the physiological consequences do not always correlate.  
70 For example, LTD at corticostriatal and hippocampal synapses lasts for more than an  
71 hour but becomes resistant to CB1R antagonists minutes after induction (Chevaleyre  
72 and Castillo, 2003; Ronesi et al., 2004; Yin et al., 2006). Therefore, strategies other

73 than measuring plasticity kinetics are required to accurately measure eCB mobilization  
74 underlying physiological phenomena of interest.

75           CB1Rs and the appropriate eCB synthesis and degradation enzymes are  
76 abundantly expressed in the dorsal lateral striatum (DLS), and indeed multiple forms of  
77 eCB-dependent depression have been described in this brain region (Calabresi et al.,  
78 2007; Mathur and Lovinger, 2012). Perhaps the most well characterized form, LTD at  
79 corticostriatal synapses, can be induced by either high frequency stimulation  
80 (HFS)(Calabresi et al., 1992; Gerdeman et al., 2002) or low frequency stimulation  
81 (LFS)(Ronesi and Lovinger, 2005). Interestingly, these two stimulation protocols may  
82 induce LTD by differentially mobilizing AEA or 2-AG, suggesting that different modes of  
83 eCB signaling can be engaged depending on the amount of neural activity (Lerner and  
84 Kreitzer, 2012). Although HFS or long bouts of LFS result in eCB-LTD in the DLS, these  
85 stimulation patterns do not accurately recapitulate the *in vivo* firing patterns of striatal-  
86 projecting pyramidal neurons in the cortex or firing patterns of medium spiny neurons  
87 (MSNs) in the striatum (Costa et al., 2004). In other brain regions, eCB-dependent  
88 plasticity can be induced by brief bouts of synaptic stimulation (Brown et al., 2003;  
89 Galante and Diana, 2004; Maejima et al., 2001; Maejima et al., 2005), and eCBs should  
90 also be mobilized by physiologic patterns of afferent stimulation in the DLS.

91           Optical techniques are rapidly emerging for the study of neuromodulation in *ex*  
92 *vivo* and *in vivo* models. In particular, intensity-based genetically encoded biosensors,  
93 based on the GPCR scaffold, are being implemented to uncover unrecognized  
94 physiological mechanisms across multiple neurotransmitter systems (Liang et al., 2015;

95 Mizuno et al., 2019; Ravotto et al., 2020; Wang et al., 2018). These new generation  
96 sensors have several desirable characteristics including; inherent ligand specificity and  
97 affinity, rapid reporting dynamics, high spatial resolution, cellular targeting capability,  
98 and disabled effector coupling. A novel biosensor engineered on the GPCR platform,  
99 called GRAB<sub>eCB2.0</sub> (GPCR-Activation Based), was recently developed for detection of  
100 eCBs (Dong et al., 2020). This sensor was engineered by inserting a circular  
101 permuted GFP into the third intracellular loop of human CB1R and can thus report on  
102 both 2-AG and AEA signaling. We used this sensor in an *ex vivo* brain slice photometry  
103 technique to study eCB mobilization kinetics, neural activity rules supporting eCB  
104 generation, and neurochemical pathways underlying eCB synthesis and degradation in  
105 the striatum.

106

## 107 **Materials and Methods**

### 108 *Animals*

109 All animal studies were conducted in accordance with the National Institutes of  
110 Health's *Guidelines for Animal Care and Use* and all experimental protocols were  
111 approved by the National Institute on Alcohol Abuse and Alcoholism Animal Care and  
112 Use Committee. C57BL/6J and ChAT-IRES-Cre (B6.129S-Chat<sup>tm1(cre)Lowl/MwarJ</sup>, Stock  
113 No: 031661) mice (8-10 weeks) were ordered from The Jackson Laboratory (Bar  
114 Harbor, ME, USA). *Drd2*<sup>LoxP/LoxP</sup>(*Drd2*<sup>tm1Mrub</sup>(Bello et al., 2011)) mice were maintained in  
115 house on a C57BL/6J background. To generate mice lacking D2Rs in cholinergic  
116 interneurons, mice heterozygous for the ChAT-IRES-Cre allele and homozygous for the

117 Drd2LoxP allele ( $Drd2^{LoxP/LoxP}ChAT^{IRES-Cre/WT}$ ) were bred with mice homozygous for the  
118 Drd2LoxP allele ( $Drd2^{LoxP/LoxP}$ ). Genotypes were determined by polymerase chain  
119 reaction (PCR) using genomic DNA from ear biopsies.

120

### 121 *Viral vectors*

122 AAV2/9.hSyn.GRAB<sub>eCB2.0</sub>.WPRE.hGHpolyA (Titer:  $1.0 \times 10^{13}$  GC/mL) and  
123 AAV2/9.hSyn.GRAB<sub>eCBMUT</sub>.WPRE.hGHpolyA (Titer:  $1.0 \times 10^{13}$  GC/mL) were purchased  
124 from Vigene Biosciences (Rockville, MD, USA).

125 AAV2/9.hSyn.GRAB<sub>ACh3.0</sub>.WPRE.hGHpolyA (Titer:  $2.4 \times 10^{13}$  GC/mL) was packaged in  
126 house as described below. All viruses were aliquoted and stored at  $-80^{\circ}\text{C}$ .

127

### 128 *Viral production*

129 AAV vectors were produced using a helper free triple transfection procedure  
130 similar to that previously described (Xiao et al., 1998). 293AAV cells (Cell Biolabs, Inc)  
131 were cultured in Dulbecco's modified Eagle's medium (DMEM) with GlutaMAX  
132 (ThermoFisher, Waltham, MA, USA) and supplemented with non-essential amino acids  
133 (NEAA, Gibco™), 10% FBS (Gibco™) and antibiotics (100  $\mu\text{g}/\text{mL}$  penicillin and  $\mu\text{g}/\text{mL}$   
134 streptomycin, Gibco™). Cells were seeded at a density of  $\sim 80\%$  in T175 tissue culture  
135 flasks and transfected with 0.165  $\mu\text{g}$  pDNA/ $\text{cm}^2$  in a 1:1:1 molar ratio of  
136 pAAV2.hSyn.GRAB<sub>ACh3.0</sub>.WPRE.hGHpolyA shuttle vector, pR/C9 and pHelper vectors  
137 (Cell Biolabs, San Diego, CA) complexed to polyethylenimine (PEI) (N/P ratio = 5). After  
138 72 hr cells were harvested, resuspended in FBS-free DMEM and lysed by repeated

139 freeze/thaw cycles. The lysate was centrifuged at 10,000g for 20 min and the cleared  
140 supernatant was collected and incubated with benzonase (50U/mL, Sigma-Aldrich, St  
141 Louis, MO, USA) for 1 hr at 37°C. The cleared supernatant was then subject to  
142 ultracentrifugation through an iodixanol density gradient similar to previously described  
143 techniques (Strobel et al., 2015). Iodixanol gradients were layered in 13.2 mL thin wall  
144 tubes (14 x 89 mm, Beckman Coulter, Indianapolis, IN, USA). The Iodixanol steps were  
145 layered in the following order: 1 mL 60% iodixanol, 1.8 mL 40% iodixanol, 2.2 mL 25%  
146 iodixanol, 3 mL 15% iodixanol w/ 1M NaCl. The cleared supernatant containing the AAV  
147 particles was layered on top of the gradient and centrifuged in a SW41 rotor (Beckman  
148 Coulter) at 41,000 RPM for 4.5 hr at 10°C. After ultracentrifugation, the 40% iodixanol  
149 layer containing purified AAV particles was collected and the iodixanol was exchanged  
150 for dPBS and concentrated to 100 µL. The AAV sample was passed through a 0.22 µm  
151 filter and analyzed by silver stain and quantitative PCR (qPCR).

152 An aliquot of purified virus was serial diluted, denatured in 1 M DDT and 1x lane  
153 marker for 5 min at 90°C, and electrophoresed on a polyacrylamide gel. Gels were  
154 stained using a Pierce™ silver stain kit according to the manufacturer's instructions  
155 (ThermoFisher) and imaged using a FluorChem E system (ProteinSimple, San Jose,  
156 CA, USA). The presence of AAV particles was confirmed by visualization of the VP1,  
157 VP2 and VP3 capsid proteins and purity by the lack of other contaminating bands.

158 AAV titer, defined as genome copies (GC)/mL was determined by qPCR. 1 µL of  
159 AAV sample was diluted into 16 µL H<sub>2</sub>O, 1µL DNase I and 2 µL 10x DNase buffer (New  
160 England Biolabs, Ipswich, MA, USA), and incubated for 30 min at 37°C. The DNase I

161 treated sample was serial diluted (1:5, 1:20, 1:100, 1:500 and 1:2500) and stored on ice  
162 for qPCR. A standard curve, using a pAAV shuttle vector containing AAV2 ITRs,  
163 ranging from  $2 \times 10^5$  to  $2 \times 10^9$  plasmid copies was constructed for calculating the AAV  
164 titer. Three 5  $\mu$ L replicates of each sample dilution and standard curve concentration  
165 were added to 15  $\mu$ L of SYBR™ Green PCR master mix (ThermoFisher) containing  
166 0.67  $\mu$ M FWD and REV primers targeting the AAV2 ITRs. qPCR was performed on a  
167 StepOnePlus™ system (ThermoFisher) using the following protocol: 3 min at 98°C,  
168 (melt at 98°C for 15 sec, anneal/extend at 60°C for 30 sec) x 39 cycles. Melt curves  
169 were performed to verify a single amplification product. The  $C_T$  value was defined as the  
170 cycle number at which the amplification curve reached a  $\Delta R_n$  ( $R_n$  – baseline, where  $R_n$   
171 is the fluorescence of the reporter dye divided by the fluorescence of a passive  
172 reference dye) threshold set at 0.1. A standard curve from the AAV2 plasmid standards  
173 (concentration by  $C_T$ ) was plotted, fit with a line and the concentration of each AAV  
174 sample dilution was determined.

175

## 176 *Surgery*

177 Mice were anesthetized with isoflurane and stereotaxically injected with AAV  
178 vectors into motor cortex (100 nL, coordinates relative to bregma in mm: A/P: + 1.1;  
179 M/L:  $\pm$  1.7; D/V: - 1.6 ) or DLS (300 nL, coordinates relative to bregma in mm: A/P: +  
180 0.75; M/L:  $\pm$  2.5; D/V: - 3.5) at a rate of 25-50 nL/min, using a 7000 series 0.5  $\mu$ L  
181 Hamilton syringe (Hamilton Company, Reno, NV, USA) and Pump 11 Elite Nanomite  
182 (Harvard Apparatus, Holliston, MA, USA) syringe pump. Following surgery, mice were



183 given an injection of Ketoprofen (5 mg/kg, s.c.) and postoperative care was provided for  
184 at least two days and until mice regained their preoperative weight.

185

### 186 *Slice Photometry*

187 Mice, 4-6 weeks after viral infusion, were deeply anesthetized with isoflurane,  
188 decapitated and the brains extracted and placed in ice cold sucrose cutting solution (in  
189 mM): 194 sucrose, 30 NaCl, 4.5 KCl, 26 NaHCO<sub>3</sub>, 1.2 NaH<sub>2</sub>PO<sub>4</sub>, 10 D-glucose, 1 MgCl<sub>2</sub>  
190 saturated with 5% CO<sub>2</sub>/ 95% O<sub>2</sub>. Coronal brain slices (250 μm) were prepared with a  
191 Leica VT1200S Vibratome (Leica Microsystems, Buffalo Grove, IL) and slices were  
192 incubated at 32°C for 40-60 min in aCSF (in mM): 124 NaCl, 4.5 KCl, 26 NaHCO<sub>3</sub>, 1.2  
193 NaH<sub>2</sub>PO<sub>4</sub>, 10 D-glucose, 1 MgCl<sub>2</sub>, 2 CaCl<sub>2</sub>. After incubation at 32°C, slices were held at  
194 room temperature until transfer to a recording chamber.

195 Photometry recordings were acquired using a Zeiss Axioscope or Olympus BX41  
196 upright epifluorescence microscope equipped with a 40x 0.8 NA water emersion  
197 objective. Slices were placed in a recording chamber and superfused at ~2 mL min<sup>-1</sup>  
198 with aCSF warmed to 29-31°C. A twisted bipolar polyimide-coated stainless-steel  
199 stimulating electrode (~200 μm tip separation) was placed in the DLS just medial to the  
200 corpus callosum and slightly below the tissue surface in a region with visible  
201 fluorescence. Using the 40x objective, focus was adjusted to just below the tissue  
202 surface, at a similar height as the electrode tips. GRAB sensors were excited using  
203 either a mercury HBO 100 lamp equipped with a Zeiss FluoArc variable intensity lamp  
204 controller (Carl Zeiss Microcopy GmbH, Jena, Germany) and gated with a uniblitz

205 shutter (Vincent Associates, Rochester, NY, USA), or a 470 nm light emitting diode  
206 (LED, ThorLabs, Newton, NJ, USA). The Zeiss axiovert system was equipped with a  
207 Zeiss 38 HE filter set (Ex. 470/40, FT 495, Em. 525/50), and the Olympus BX41 was  
208 equipped with a FITC filter set (Ex. 475/28, FT 495, Em. 520/35). Excitation power was  
209 measured at the sample plane using a microscope slide photodiode power sensor  
210 (ThorLabs) and was 3.8 mW for the mercury HBO lamp and < 1.0 mW for the 470 nm  
211 LED. A 180  $\mu\text{m}^2$  aperture located in the light path between the microscope and  
212 photomultiplier tube (PMT) was used so photons were collected from a region of interest  
213 just medial to the stimulation electrode tips. Photons passing through the aperture were  
214 directed to a PMT (Model D-104, Photon Technology International, Edison, NJ, USA)  
215 with the cathode voltage set to 300-400 V. The PMT output was amplified (gain: 0.1  
216  $\mu\text{A/V}$ ; time constant: 5 msec), filtered at 50 Hz and digitized at 250 Hz using a Digidata  
217 1322A or a 1550B and Clampex software (Axon Instruments, Molecular Devices LLC,  
218 Sunnyvale, CA, USA). For all experiments, GRAB sensor measurements were acquired  
219 as discrete trials repeated every 3 minutes. For each trial, the light exposure period was  
220 35-45 seconds to minimize sensor photobleaching, while capturing peak responses and  
221 the majority of the decay phase (**Figure 1C**). To evoke an eCB or ACh transient, a burst  
222 of electrical pulses (1.0-1.5 mA, 200-500  $\mu\text{s}$ ) was delivered 5 s after initiating  
223 fluorophore excitation. Transients were calculated as  $\Delta F/F$  by averaging the PMT  
224 voltage (V) for a period of 1 s just prior to electrical stimulation (F) and then calculating  
225  $V/F-1$  for each digitized data sample.

226

227 *Drugs*

228           Drugs were dissolved in DMSO or dH<sub>2</sub>O at stock concentrations, aliquoted and  
229 stored at -20°C. Just prior to use, drugs were diluted to working concentrations in aCSF.  
230 The final concentration of DMSO was < 0.1%, a concentration that did not affect evoked  
231 eCB transients.  $\beta$ -cyclodextrin (3.0 mg/50 mL, MilliporeSigma, Burlington, MA, USA)  
232 was included as a carrier for AM251 and DO34 solutions. The compounds 2-AG, AEA,  
233 AM251, URB597, JZL184, (-)-Quinpirole hydrochloride, VU 0255035, (RS)-3,5-  
234 Dihydroxyphenylglycine (DHPG), 6,7-Dinitroquinoxaline-2,3-dione (DNQX) disodium salt,  
235 DL-2-Amino-5-phosphonopentanoic acid (DL-AP5), JNJ16259685 and 2-Methyl-6-  
236 (phenylethynyl)pyridine (MPEP) hydrochloride were purchased from Tocris (Minneapolis  
237 MN, USA). ( $\pm$ )-Sulpiride was purchased from MilliporeSigma. DO34 was purchased  
238 from Aobious (Gloucester, MA, USA). VU 0486846 was generously provided by Dr.  
239 Jeffery Conn (Vanderbilt University, Nashville, TN, USA).

240

#### 241 *Data analysis*

242           Slice photometry raw data were collected and analyzed using the pClamp™  
243 software suit (v9.2 and v10; Molecular Devices, San Jose, CA, USA). Photometry  
244 sweeps were exported to Microsoft Excel (v16.3; Redmond, WA, USA) to calculate  
245 normalized  $\Delta F/F$  traces, peak  $\Delta F/F$  values, eCB mobilization time and % baseline  
246 timecourse data. Rise  $t_{1/2}$  was calculated in Graphpad Prism (v8.3; San Diego, CA,  
247 USA) by fitting the rising phase of the eCB transient with an asymmetrical logistic curve.  
248 Statistical analysis and graph rendering were performed using Graphpad Prism.  
249 Baseline normalized timecourse data were analyzed using one sample t-tests, 1-way

250 rmANOVAs followed by Tukey's multiple comparisons test or by 2-way rmANOVAs  
251 followed by Sidak's multiple comparisons test. For t-tests and 1-way rmANOVA  
252 analysis, baseline was the average peak  $\Delta F/F$  of 5 predrug sweeps (for 1-way ANOVA  
253 only), drug condition was the average peak  $\Delta F/F$  of the last two data points of the drug  
254 application period (except for (RS)-DHPG experiments where only the sweep with the  
255 highest peak  $\Delta F/F$  was used) and washout/antagonist wash (for 1-way ANOVA only)  
256 was the average of the last two data points during that period. Data are plotted as mean  
257  $\pm$  standard error of the mean.

258

## 259 **Results**

260 *The novel genetically encoded biosensor, GRAB<sub>eCB2.0</sub>, detects eCB transients induced*  
261 *by electrical stimulation in the DLS.*

262 To study eCB mobilization in the DLS, we used an *ex vivo* brain slice photometry  
263 technique similar to published reports using GCaMP calcium sensors (Kupferschmidt  
264 and Lovinger, 2015; Sgobio et al., 2014). AAV2/9.hSyn.GRAB<sub>eCB2.0</sub> and  
265 AAV2/9.hSyn.GRAB<sub>eCBMUT</sub> vectors were infused into motor cortex (M1/M2) of wildtype  
266 C57BL/6J mice and ~ 4-6 weeks later, eCB transients were measured at corticostriatal  
267 afferents in the DLS (**Figure 1A-C**).

268 Fluorescent transients from GRAB<sub>eCB2.0</sub> were evoked by 1s train stimulation and  
269 the amplitude of these transients increased with higher stimulation frequencies up to  
270 100 Hz (n = 3, **Figure 1D**). To confirm the specificity of the fluorescent transients, slices  
271 were preincubated in AM251 (10  $\mu$ M) for ~1 hr before performing photometry

272 experiments. In these slices, fluorescent transients were not detected in response to  
273 train stimulation up to 100Hz (n = 3). Additionally, evoked eCB transients could not be  
274 measured with the GRAB<sub>eCBMUT</sub> sensor (n = 6, **Figure 1E**), which contains the mutation  
275 F177A that greatly reduces 2-AG and AEA affinity, demonstrating that the fluorescent  
276 transients measured with GRAB<sub>eCB2.0</sub> are dependent on agonist occupancy of the  
277 orthosteric binding site of CB1R contained within the sensor.

278         In the cerebellum, brief stimulation of parallel fibers (i.e. 5 or 10 pulses at 50 Hz)  
279 triggers eCB mobilization and short-term depression (Brown et al., 2003; Maejima et al.,  
280 2001). We tested whether similar stimulation protocols are sufficient to activate eCB  
281 production in the DLS. Indeed, eCB transients could be measured in response to brief  
282 trains of electrical stimulation (**Figure 2**). Paired-pulse stimulation evoked small, but  
283 measurable, eCB transients that increased slightly in amplitude at higher frequencies.  
284 Trains of 5 or 10 pulses evoked larger transients that were augmented by increasing the  
285 stimulation frequency up to 100 Hz (**Figure 2A&B**). The eCB transients developed over  
286 several seconds measured from the start of train stimulation, with a mean  $t_{1/2}$  rise time  
287 of  $1.4 \pm 0.03$  seconds regardless of stimulation frequency (**Figure 2C**). The eCB decay  
288 phase was well described by a single exponential function and was similar across all  
289 stimulation pulse numbers and frequencies with a mean tau of  $13.7 \pm 0.3$  seconds  
290 (**Figure 2D**).

291         There was a notable delay between the start of synaptic stimulation and any  
292 measurable increase in GRAB<sub>eCB2.0</sub> fluorescence, which we refer to as the eCB  
293 mobilization time or  $t_{eCB}$  (**Figures 2E,F**). The  $t_{eCB}$  represents the cumulative time from

294 the start of synaptic stimulation and recruitment of postsynaptic eCB production  
295 machinery, to retrograde eCB transit and binding to the GRAB<sub>eCB2.0</sub> sensor. Thus, this  
296 measurement may correlate with the minimum time required for eCB-dependent  
297 presynaptic inhibition (Heinbockel et al., 2005). The  $t_{eCB}$  was measured from the start of  
298 train stimulation to the time at which the presynaptic GRAB<sub>eCB2.0</sub> fluorescence reached a  
299 threshold set at 3x rms of the baseline fluorescence and was  $0.301 \pm 0.01$  seconds  
300 regardless of stimulation frequency (**Figure 2F**).

301

302 *2-AG is the predominant eCB mobilized by brief synaptic stimulation in the DLS.*

303 Previous studies have shown that both 2-AG and AEA can be generated by  
304 synaptic stimulation in the striatum, but which eCB predominates depends on the  
305 specific experimental induction protocol used (Lerner and Kreitzer, 2012). To investigate  
306 whether 2-AG and/or AEA are mobilized by brief synaptic stimulation, we measured the  
307 effect of monoacylglycerol lipase (MAGL) or fatty acid amide hydrolase (FAAH)  
308 inhibition on eCB transients evoked by a 5 pulse burst at 20Hz (**Figure 3**). Over the  
309 course of 75 minutes, JZL184 (2  $\mu$ M) prolonged the eCB transient decay rate ( $321 \pm$   
310  $69.9\%$  of baseline,  $p < 0.05$ ,  $n = 5$ ), consistent with inhibition of 2-AG degradation.  
311 Additionally, the basal fluorescence,  $F$ , increased ( $155.3 \pm 21.8\%$  of baseline,  $n = 6$ ),  
312 indicating that MAGL inhibition generates a 2-AG tone in the DLS. In contrast, bath  
313 application of URB597 (1  $\mu$ M) did not significantly prolong the decay rate of the evoked  
314 eCB transient (**Figure 3B**,  $134.6 \pm 14.8\%$  of baseline,  $p > 0.05$ ,  $n = 5$ ), or change the  
315 basal fluorescence ( $108.1 \pm 4.4\%$  of baseline,  $p > 0.05$ ,  $n = 5$ ). To confirm that the eCB

316 transients evoked by brief synaptic stimulation were 2-AG, we tested whether  
317 diacylglycerol lipase (DAGL) inhibition would inhibit the transients evoked by 5 pulse  
318 bursts at 20 Hz (**Figure 3C**). Indeed, preincubating slices in the DAGL inhibitor, DO34  
319 (1 $\mu$ M), for ~1 hr significantly reduced the peak amplitude of the eCB transient over a  
320 range of stimulation intensities (  $p < 0.0001$ ,  $n = 5/6$ ).

321

322 *Metabotropic and ionotropic glutamate receptors contribute to 2-AG mobilization*  
323 *following brief synaptic stimulation*

324 Group I mGluRs induce eCB-dependent plasticity at many synapses in the brain,  
325 including the corticostriatal synapse (Calabresi et al., 1992; Gubellini et al., 2001;  
326 Kreitzer and Malenka, 2005; Sung et al., 2001). In the DLS, mGlu1 and mGlu5 are  
327 implicated in HFS-LTD and exogenous activation mGlu1/5 induces eCB-LTD (Kreitzer  
328 and Malenka, 2005). Therefore, we tested whether 2-AG production evoked by brief  
329 synaptic stimulation (5p 20Hz) involved recruitment of mGlu5 and/or mGlu1 (**Figure 4**).  
330 Bath application of the mGlu5 negative allosteric modulator (NAM) MPEP (10  $\mu$ M)  
331 reduced the amplitude of the 2-AG transient to  $79.8 \pm 6.0\%$  of baseline (**Figure 4A**,  $p <$   
332  $0.01$ ,  $n = 5$ ) and bath application of the mGlu1 NAM, JNJ16259685 (JNJ'685, 1 $\mu$ M),  
333 reduced the amplitude of the 2-AG transient to  $83.9 \pm 6.1\%$  of baseline (**Figure 4B**,  $p <$   
334  $0.05$ ,  $n = 5$ ). Given the role of mGlu5 and mGlu1 in evoked 2-AG transients, we tested  
335 whether activation of mGlu1/5 with an exogenous agonist could enhance the 2-AG  
336 transient. Bath application of (RS)-DHPG (100  $\mu$ M) caused a biphasic change in the  
337 amplitude of the evoked 2-AG transient (**Figure 4C**). The maximum augmentation was

338 173.3 ± 7.4 % of baseline, which occurred during the first evoked transient following  
339 (RS)-DHPG application (n = 5, p < 0.0001). This modulation subsequently decayed over  
340 time with the 2-AG amplitude plateauing at 75.3 ± 4.1 % of baseline (n = 5, p < 0.05).  
341 The baseline fluorescence intensity (F, as defined in Figure 1C) was not changed by  
342 (RS)-DHPG (data not shown). Collectively, these results show that group I mGluRs can  
343 couple to 2-AG generation mechanisms as previously demonstrated in the DLS using  
344 electrophysiology approaches, and that mGlu5 and mGlu1 activation contributes to 2-  
345 AG generation following brief synaptic stimulation.

346 Postsynaptic depolarization and activation of voltage gated calcium channels is  
347 required for many forms of eCB dependent STD and LTD. One presumed source of  
348 depolarization for synaptically-driven eCB generation is ionotropic AMPA receptors  
349 (AMPA receptors) (Brown et al., 2003). However, few reports directly demonstrate the  
350 involvement of AMPARs in eCB production because AMPAR mediated EPSC/EPSP  
351 amplitude is a primary measurement for studying eCB physiology at excitatory  
352 synapses. With the ability to measure eCB generation directly using GRAB<sub>eCB2.0</sub>, we  
353 tested the hypothesis that AMPARs are a primary voltage source for synaptically driven  
354 2-AG production in the DLS (**Figure 4D**). Bath application of the AMPAR antagonist,  
355 DNQX (10 μM), rapidly decreased the amplitude of evoked (5p 20Hz) 2-AG transients to  
356 33.1 ± 8.1% of the baseline amplitude (n = 5, p < 0.0001), which reversed back towards  
357 baseline over a 30 min washout period (81.1 ± 3.4% baseline, p < 0.001 compared to  
358 DNQX). We next tested if AMPAR-dependent depolarization engaged L-type calcium  
359 channels leading to 2-AG generation. Bath application of the LTCC blocker, nifedipine



360 (10  $\mu$ M), did not reduce the amplitude of the evoked 2-AG transient (data not show),  
361 suggesting another voltage sensitive calcium channel/receptor may be responsible for  
362 triggering 2-AG generation. One possibility is the NMDA receptor (NMDAR). Indeed,  
363 bath application of the NMDAR antagonist, DL-AP5 (50  $\mu$ M), resulted in a rapid  
364 reduction in the evoked 2-AG transient to 25.7% of baseline (**Figure 4E**,  $n = 4$ ,  $p <$   
365  $0.0001$ ), which reversed back towards baseline over a 30 min washout period ( $65.8 \pm$   
366  $7.9\%$  baseline,  $p < 0.05$  compared to DL-APV).

367

### 368 *Muscarinic M1 receptors contribute to synaptically driven 2-AG mobilization*

369 In the dorsal striatum, muscarinic M1 receptors (M1Rs) enhance eCB-dependent  
370 DSI (Narushima et al., 2007) and are required for eCB mediated spike timing-dependent  
371 plasticity (Fino et al., 2010). On the other hand, M1Rs inhibit HFS-LTD by inhibiting L-  
372 type calcium channels (Wang et al., 2006). Given these opposing roles in modulating  
373 eCB short-term and long-term plasticity, we investigated the role of M1Rs on 2-AG  
374 generation following brief synaptic stimulation (5p 20Hz). Bath application of the M1R  
375 antagonist VU 0255035 (VU'035, 1  $\mu$ M) reduced the amplitude of the evoked 2-AG  
376 transient to  $36.1 \pm 4.3\%$  of the baseline ( $n = 3$ ,  $p < 0.001$ ), which did not washout  
377 (**Figure 5A**). To further investigate the role of M1Rs on 2-AG production, we bath  
378 applied the M1R positive allosteric modulator (PAM), VU 0486846 (VU'846, 10  $\mu$ M),  
379 which increased the 2-AG peak amplitude to  $274.4 \pm 40.6\%$  of baseline ( $n = 5$ ,  $p < 0.01$ ,  
380 **Figure 5B**). The baseline fluorescence intensity (F) was not changed by VU'035 or  
381 VU'846 (data not shown), suggesting that tonic acetylcholine (ACh) release from

382 cholinergic interneurons (CINs) does not generate an eCB tone through M1R  
383 stimulation.

384

385 *M1R and Group I mGluRs facilitate 2-AG production by distinct mechanisms*

386 Both M1R and AMPAR antagonists robustly inhibited (> 60%) 2-AG production,  
387 suggesting these receptors converge on a common signaling mechanism. To  
388 investigate this possibility, we measured the effect of the M1R PAM, VU'846, on 2-AG  
389 generation while blocking AMPA receptors (**Figure 6A**). First, DNQX (10  $\mu$ M) was bath  
390 applied, which reduced the 2-AG transient to  $34.4 \pm 2.6\%$  of baseline ( $n = 3$ ,  $p <$   
391  $0.0001$ ), a similar magnitude of inhibition as observed in the previous experiment with  
392 this antagonist. After the inhibitory effect of DNQX plateaued, VU'846 (10  $\mu$ M) was co-  
393 applied with DNQX. DNQX completely occluded the effect of VU'846 on 2-AG  
394 production ( $p > 0.05$  compared to DNQX alone), suggesting that M1Rs and AMPARs  
395 share a common signaling pathway leading to 2-AG production. It is possible that  
396 AMPARs located on CINs are required for driving ACh release rather than directly  
397 involved in eCB production in MSNs. To test this hypothesis, we expressed the  
398 genetically encoded ACh sensor, GRAB<sub>ACh3.0</sub> (Jing et al., 2020) in the DLS and  
399 measured ACh transients evoked by train stimulation (5 pulses at 20 Hz). Bath  
400 application of DNQX (10  $\mu$ M), did not change the amplitude of the evoked ACh  
401 transients (data not shown), demonstrating that the role of AMPA receptors in 2-AG  
402 production is not related to ACh release. Another possibility is that AMPA receptors  
403 depolarize the postsynaptic cell allowing NMDA receptor activation and subsequent

404 Ca<sup>2+</sup> influx that feeds into M1R signaling mechanisms. If this hypothesis is correct, then  
405 inhibition of NMDA receptors should also occlude the effect of VU'846 on 2-AG  
406 production. Bath application of DL-AP5 (50 μM) reduced the amplitude of the 2-AG  
407 transient to 28.6% ± 2.3% of baseline (n = 4, p < 0.0001), similar to the previous  
408 experiment with this antagonist, and occluded the effect of VU'846 on 2-AG production  
409 (p > 0.05 compared to DL-AP5 alone, **Figure 6B**).

410         Given that M1R and mGlu1/5 both couple to G<sub>αq/11</sub> heterotrimeric g-proteins, we  
411 investigated whether (RS)-DHPG enhancement of 2-AG production was also dependent  
412 of AMPAR activation. Again, bath application of DNQX (10 μM) reduced the 2-AG  
413 transient to 30.3 ± 6.8% of baseline (n = 3, p < 0.01), however co-application of DNQX  
414 did not block (RS)-DHPG enhancement of 2-AG production (p < 0.05 compared to  
415 DNQX, **Figure 6C**).

416

417 *Dopamine D2 receptors on cholinergic interneurons inhibit 2-AG release.*

418         Activation of dopamine D2Rs is required for the expression of HFS-LTD in the  
419 dorsal striatum. The mechanism by which D2Rs participate in HFS-LTD has been  
420 debated in the literature, however it's clear that D2Rs on cholinergic interneurons are  
421 required for inhibiting ACh release and M1R activation (Augustin et al., 2018; Wang et  
422 al., 2006). In contrast to HFS-LTD, we found that brief synaptic stimulation requires  
423 M1R activation for 2-AG generation. Thus, we hypothesized that D2Rs would inhibit,  
424 rather than promote, 2-AG generation following brief synaptic stimulation (5p 20Hz).  
425 Indeed, bath application of the D2R agonist quinpirole (1 μM), reduced the amplitude of

426 evoked 2-AG transient to  $61.1 \pm 4.2\%$  of baseline ( $n = 5$ ,  $p < 0.01$ , **Figure 7A**). The  
427 specificity of this action of quinpirole for D2Rs was confirmed by co-application of the  
428 D2R antagonist, sulpiride ( $10 \mu\text{M}$ ), which reversed the effect of quinpirole and  
429 subsequently increased the amplitude of the evoke 2-AG transient to  $131.4 \pm 11.5\%$  of  
430 the initial baseline amplitude ( $p < 0.05$ ). The rebound effect of sulpiride suggests that 20  
431 Hz electrical stimulation elicits dopamine release from midbrain dopamine (DA) fibers to  
432 limit 2-AG generation by acting on D2Rs.

433 Our results showing that M1R inhibition or D2R activation suppresses 2-AG  
434 generation is consistent with the hypothesis that D2Rs on CINs are the target of  
435 quinpirole and endogenously released DA. To support of this hypothesis, we expressed  
436 the ACh sensor, GRAB<sub>ACh3.0</sub>, in the DLS to examine the effect of D2R activation of ACh  
437 release (**Figure 7B**). ACh release evoked by 5 pulse 20 Hz train stimulation was  
438 inhibited by bath application of quinpirole ( $1 \mu\text{M}$ ,  $n = 4$ ,  $39.1\%$  of baseline,  $p < 0.05$ ),  
439 which was reversed by the addition of sulpiride ( $10 \mu\text{M}$ ,  $101.5\%$  of baseline,  $p > 0.05$   
440 compared to baseline).

441 To further confirm the role of CIN D2Rs on 2-AG production, we bred D2R-flox  
442 mice with ChAT-IRES-Cre mice to conditionally knockout D2Rs from CINs (CIN-  
443 Drd2KO) and measured the effect of quinpirole and sulpiride on 2-AG production  
444 (**Figure 7C**). Qualitatively, the 2-AG transients evoked in slices from CIN-Drd2KO mice  
445 were indistinguishable from 2-AG transients evoked in slices from wildtype C57BL/6J or  
446 D2R<sup>flox/flox</sup> mice. The inhibitory effect of quinpirole ( $1 \mu\text{M}$ ) on 2-AG production was lost in  
447 slices from CIN-Drd2KO mice ( $n=4/5$  per group,  $p < 0.001$  compared to D2R<sup>flox/flox</sup>).

448 Additionally, sulpiride (10  $\mu$ M) did not enhance 2-AG production in slices from CIN-  
449 Drd2KO mice ( $p < 0.05$  compared to D2R<sup>flox/flox</sup>). These results confirm that stimulation  
450 of D2Rs on cholinergic interneurons, by either exogenous agonist application or  
451 endogenously release DA, inhibit 2-AG generation induced by brief synaptic stimulation.

452

## 453 **Discussion**

454 In this report, we used the novel genetically encoded intensity-based biosensor,  
455 GRAB<sub>eCB2.0</sub>, in combination with brain slice photometry to study eCB signaling dynamics  
456 in the DLS. This approach offers several advantages over traditional  
457 electrophysiological techniques to studying eCB physiology. For example, we were able  
458 to make direct measurements of eCB mobilization at corticostriatal afferents, the  
459 primary site of action for eCBs, and were able study eCB mobilization mechanisms  
460 without perturbing the postsynaptic neurons. In addition, we examine the roles of  
461 ionotropic receptors more thoroughly than in past studies that relied on the function of  
462 these receptors as the readout for eCB actions. Using this approach, we show that brief  
463 bouts of synaptic stimulation induce long lasting 2-AG transients, which are dependent  
464 on convergent signals from AMPARs and G $\alpha_{q/11}$  coupled GPCRs (**Figure 8**). Our data  
465 indicate that mGlu1/5 and M1Rs trigger 2-AG mobilization through distinct mechanisms  
466 with divergent dependence on AMPAR activation and subsequent rises in intracellular  
467 Ca<sup>2+</sup> concentration through NMDARs. Furthermore, D2Rs located on CINs inhibit  
468 evoked 2-AG transients by limiting ACh release and M1R stimulation. Collectively, the

469 present study provides new insights on circuit and cellular mechanisms controlling 2-AG  
470 mobilization in the DLS.

471         We measured eCB mobilization kinetics following brief, physiologically relevant,  
472 synaptic stimulation. eCB transients could be evoked by paired-pulse stimulation, but  
473 these transients were small and variable. Increasing the number of stimuli to 5 or 10  
474 pulses produced progressively larger transients that were sensitive to stimulation  
475 frequency up to 100 Hz. Interestingly, this dependence on stimulus number and  
476 frequency closely parallels the stimulation dependence of eCB-mediated inhibition of  
477 presynaptic Ca<sup>2+</sup> transients and STD induced by synaptic stimulation in the cerebellum  
478 (Brown et al., 2003; Maejima et al., 2001), suggesting that the neural activity rules  
479 supporting eCB mobilization may be generalized across brain regions. The synaptically-  
480 evoked eCB transients were slow compared to the signaling dynamics of many other  
481 neurotransmitter systems. The transients took several seconds to reach peak  
482 amplitudes and decayed over the course of tens of seconds; kinetics consistent with  
483 reported durations of eCB-dependent STD. In contrast, transients evoked by single or  
484 multiple stimuli and measured with GPCR-based ACh and DA sensors peak within less  
485 than a second and persist for only a few seconds after stimulus cessation (Jing et al.,  
486 2020; Patriarchi et al., 2018; Sun et al., 2018). The minimum time from the onset of  
487 synaptic stimulation to detecting eCBs at corticostriatal afferents, which we have  
488 defined as the eCB mobilization time ( $t_{eCB}$ ), was ~300 ms regardless of stimulation  
489 protocol. In our experiments,  $t_{eCB}$  represents the cumulative time for glutamate and ACh  
490 release, post synaptic eCB generation, retrograde transit to corticostriatal membranes,

491 and finally activation of GRAB<sub>eCB2.0</sub>. Thus, this measurement likely indicates the  
492 minimum time required for eCB-dependent presynaptic inhibition following synaptic  
493 stimulation. Consistent with this notion, our measurements of  $t_{eCB}$  are similar to  
494 estimates of the minimum time required for DSI expression ( $t_{DSI}$ ) in CA1 pyramidal cells  
495 (Heinbockel et al., 2005).

496 eCB transients evoked by brief synaptic stimulation (5p 20 Hz) were sensitive to  
497 MAGL inhibition, indicating that 2-AG is mobilized under these conditions. Specifically,  
498 when GRAB<sub>eCB2.0</sub> was expressed in corticostriatal afferents, MAGL inhibition prolonged  
499 the decay component of the eCB transient and increased basal fluorescence, consistent  
500 with the generation of a 2-AG tone. Furthermore, DAGL inhibition decreased the peak  
501 amplitude of the of eCB transient by 75-80%, suggesting that 2-AG is the primary eCB  
502 evoked by our stimulation protocol. On the other hand, FAAH inhibition, did not  
503 significantly affect on eCB transients evoked using the same stimulation protocol,  
504 suggesting that AEA is not efficiently mobilized under these conditions.

505 2-AG transients evoked by brief synaptic stimulation were dependent on  
506 ionotropic and metabotropic glutamate receptors. Inhibition of mGlu5 or mGlu1  
507 decreased the 2-AG transient by 15-20%,. Furthermore, the mGlu1/5 agonist, DHPG,  
508 increased the 2-AG transient by 175%, indicating that the 5p 20Hz train stimulation  
509 protocol does not saturate mGlu1/5 dependent eCB mobilization pathways.  
510 Interestingly, the effect of DHPG was bi-phasic as the initial potentiation of 2-AG  
511 generation gradually declined and eventually lead to depression. There are two  
512 explanations for these results. First, DHPG enhancement of 2-AG signaling may

513 activate a negative feedback mechanism by which the enhanced 2-AG production leads  
514 to depression of corticostriatal transmission and disengagement of AMPAR activation,  
515 which our data show is a critical component of 2-AG generation. Alternatively, it is  
516 possible that prolonged application of DHPG leads to receptor desensitization  
517 effectively reducing mGluR signaling. Supporting this mechanism, the delayed DHPG  
518 depression of 2-AG production was similar in magnitude to the inhibition observed with  
519 mGluR antagonism. We favor this latter mechanism because VU'846, an M1R PAM that  
520 also augments evoked 2-AG mobilization, did not have the same biphasic effect.  
521 However, we cannot rule out potential differences between mGluR and M1R signaling  
522 that may contribute to differences in eCB production.

523         We found that blocking AMPA receptors decreased the 2-AG transient by 67%  
524 indicating that these receptors are indispensable for robust 2-AG generation evoked by  
525 brief synaptic stimulation. A previous study was able to show the involvement of  
526 AMPARs in synaptically generated eCB-STD in the cerebellum by optical  
527 measurements of presynaptic Ca<sup>2+</sup> transients, however, AMPARs were only a minor  
528 component (Brown et al., 2003). Our experiments suggest that AMPAR activation  
529 depolarizes the postsynaptic membrane allowing NMDAR activation and a subsequent  
530 rise in intracellular Ca<sup>2+</sup>, as inhibition of NMDARs decreased the 2-AG transient by 74%.

531         Muscarinic M1Rs modulate STD and LTD in several brain regions. In the DLS,  
532 M1Rs are required for LTD induced by STDP protocols (Fino et al., 2010), but suppress  
533 LTD induced by HFS (Wang et al., 2006). Furthermore, M1Rs enhance DSI in MSNs  
534 and can promote DSE through synergistic actions with mGlu5 (Narushima et al., 2007;



535 Uchigashima et al., 2007). Thus, depending on the eCB induction protocol, M1Rs can  
536 either promote or suppress eCB-dependent plasticity. In the current study, 2-AG  
537 transients were robustly inhibited by M1R antagonists and augmented by a M1R PAM,  
538 indicating that ACh released from CINs provides a major contribution to 2-AG  
539 production induced by brief trains of synaptic stimulation. Our data show that blocking  
540 M1Rs, AMPARs or NMDARs inhibited the eCB transient by 60-75%, suggesting these  
541 receptors converge on a common signaling pathway leading to eCB production. Indeed,  
542 inhibiting AMPARs or NMDARs blocked 2-AG enhancement by the M1R PAM. Our data  
543 showing that AMPAR antagonists don't inhibit evoked ACh release, measured with  
544 GRAB<sub>ACh3.0</sub>, argue against a role for ionotropic glutamate receptors on CINs in the ACh  
545 release that drives M1R activation. Alternatively, activation of AMPARs and NMDARs  
546 on MSNs can lead to rises in intracellular Ca<sup>2+</sup> that may converge with Gα<sub>q/11</sub> signaling  
547 mechanisms, leading to 2-AG generation.

548         In contrast to M1Rs, the effect of mGlu1/5 stimulation is independent of AMPAR  
549 activation as DHPG still enhanced the eCB transient in the presence of AMPAR  
550 antagonists. These results suggest that in the context of brief synaptic stimulation,  
551 M1Rs generate 2-AG through a Ca<sup>2+</sup>-assisted receptor-driven eCB release (Ca<sup>2+</sup>-  
552 assisted RER) mechanism, while mGlu1/5s may signal by a Ca<sup>2+</sup> independent  
553 receptor-driven eCB release (RER) mechanism. Our findings suggesting that mGlu1/5  
554 signals through an RER mechanism is consistent with reports in the hippocampus and  
555 cerebellum (Chevalleyre and Castillo, 2003; Kim et al., 2002; Maejima et al., 2001). In  
556 the DLS, however, DHPG-induced LTD is dependent on postsynaptic depolarization

557 and L-type calcium channels (Kreitzer and Malenka, 2005). Although these results are  
558 in contrast to our observations, in the striatum mGlu1/5 can trigger eCB-LTD  
559 through Ca<sup>2+</sup>-dependent and Ca<sup>2+</sup>-independent mechanisms (Lerner and Kreitzer,  
560 2012). The study by Lerner and Kreitzer showed LTD requiring 2-AG mobilization is  
561 Ca<sup>2+</sup> independent, consistent with our findings, while LTD requiring AEA mobilization is  
562 Ca<sup>2+</sup> dependent. Indeed, Ca<sup>2+</sup> dependent AEA mobilization underlying HFS-LTD  
563 induction in the DLS is in agreement with previous reports (Ade and Lovinger, 2007;  
564 Calabresi et al., 1994; Choi and Lovinger, 1997). Thus, the Ca<sup>2+</sup> dependence of  
565 mGlu1/5 induced eCB mobilization might depend on whether the cellular context favors  
566 2-AG or AEA production.

567       Activation of D2Rs by exogenous application of quinpirole or by endogenous DA  
568 release suppressed the amplitude of evoked 2-AG transients. This result was somewhat  
569 surprising because D2R activation is required for eCB-dependent LTD in the DLS  
570 (Calabresi et al., 1992) and quinpirole inhibits evoked EPSCs in MSNs in a frequency  
571 and CB1R-dependent manner (Wang et al., 2012; Yin and Lovinger, 2006). In the  
572 context of HFS-LTD, D2Rs expressed on CINs promote eCB signaling by limiting ACh  
573 release and subsequent activation of M1Rs located on MSNs (Augustin et al., 2018;  
574 Wang et al., 2006), which is opposite to the mechanism uncovered in our study. These  
575 independent findings, although seemingly contradictory, suggest that M1Rs can either  
576 inhibit or augment eCB production, depending on the level of neural activity, and D2Rs  
577 regulate the magnitude of eCB modulation by M1Rs regardless of the sign. Importantly,  
578 2-AG is the predominate eCB mobilized following brief synaptic stimulation in our study,

579 while evidence suggests that AEA is the predominate eCB underlying HFS-LTD (Ade  
580 and Lovinger, 2007; Lerner and Kreitzer, 2012). Thus, it is conceivable that the D2R-  
581 ACh-M1R signaling mechanism differently regulates 2-AG and AEA production. In  
582 support of this hypothesis, activation of D2-like DA receptors increases AEA levels in  
583 the dorsal striatum and limbic forebrain, while D2R inhibition increases 2-AG content in  
584 limbic forebrain (Giuffrida et al., 1999; Patel et al., 2003). At the molecular level, M1Rs  
585 couple to  $G_{\alpha q/11}$  so 2-AG production may well occur through the canonical PLC and  
586 DAGL pathway. On the other hand, M1Rs can inhibit LTCCs (Howe and Surmeier,  
587 1995; Perez-Burgos et al., 2008), which is the mechanism responsible for suppressing  
588 eCB-LTD and presumably AEA production. Interestingly, in our study, 2-AG production  
589 required NMDARs, rather than LTCCs, thus different sources of  $Ca^{2+}$  influx may  
590 contribute to differential regulation of eCBs by M1Rs.

591 In conclusion, we implemented the novel genetically encoded biosensor,  
592 GRAB<sub>eCB2.0</sub>, to uncover unrecognized signaling mechanisms underlying 2-AG  
593 production in the DLS. We confirmed the involvement of ionotropic receptors in eCB  
594 production, which has long been hypothesized, but largely intractable to traditional  
595 electrophysiological techniques. In addition, we made direct measurements of eCB  
596 production on physiological time scales, which has not been possible previously.  
597 Undoubtedly, GRAB<sub>eCB2.0</sub> will prove useful in future studies, *in vivo* and in reduced  
598 preparations, to gain further insight into eCB signaling under physiological and  
599 pathological conditions (Dong et al., 2020).

600

601 **Author contributions**

602 D.J.L and D.M.L designed the experiments. D.J.L performed the experiments and  
603 analyzed the data. A.D. K.H. and Y.L. provided the GRAB<sub>eCB2.0</sub> and GRAB<sub>ACh3.0</sub> sensor  
604 constructs. H.L.P contributed to sensor validation experiments. D.J.L. and D.M.L wrote  
605 the manuscript with input from the other authors.

606

607 **Funding**

608 This work was supported by the National Institutes of Health, National Institute on  
609 Alcohol Abuse and Alcoholism, Division of Intramural Clinical and Biological Research  
610 (ZIA AA000416).

611

612 **Acknowledgements**

613 We thank Guoxiang Luo for genotyping assistance. We are grateful to the NIAAA  
614 animal care staff for their excellent animal husbandry and veterinary care.

615

616 **Figure legends**

617 **Figure 1.** GRAB<sub>eCB2.0</sub> detects eCB transients in brain slice. A) AAV vectors encoding  
618 GRAB<sub>eCB2.0</sub> were infused into motor cortex (M1/M2) and fluorescence from corticostriatal  
619 afferents was measured in the DLS. B) Representative fluorescent micrographs of  
620 GRAB<sub>eCB2.0</sub> expression at the injection site in M1/M2 and in corticostriatal afferents in  
621 the DLS. C) Top: raw photometric recording labeled to indicate F and  $\Delta F$   
622 measurements, epifluorescence exposure time and timing of electrical stimulation.

623 Bottom: normalized eCB transient evoked by a train of electrical stimuli. D) GRAB<sub>eCB2.0</sub>  
624 fluorescent transients evoked by 1s train stimulation at the indicated frequency were  
625 blocked by AM251 (n = 3 slices/group, 2-way RM ANOVA, Drug:  $F_{(1,8)} = 113.8$ ,  $p <$   
626  $0.0001$ ; Frequency:  $F_{(3,8)} = 5.9$ ,  $p < 0.05$ ; Interaction:  $F_{(3,8)} = 2.6$ ,  $p > 0.05$ ) . E)  
627 Fluorescent transients could not be detected with the GRAB<sub>eCBMUT</sub> control sensor.

628

629 **Figure 2.** Evoked eCB transients are modulated by stimulation frequency and duration.

630 A) Representative traces of eCB transients evoked by brief trains of synaptic  
631 stimulation. B) The amplitude of the eCB transient increased as a function train pulse  
632 number and stimulation frequency. C) The eCB transient rise time, defined at the time to  
633 reach 50% of the transient peak amplitude, were similar across all stimulation protocols.  
634 D) Decay kinetics were similar across all stimulation protocols. E) Schematic illustrating  
635 the calculation of eCB mobilization time ( $t_{eCB}$ ). F) The  $t_{eCB}$  was similar across all  
636 stimulation protocols.

637

638 **Figure 3.** 2-AG is the main eCB mobilized by brief synaptic stimulation. A) Bath  
639 application of MAGL inhibitor, JZL184, for 75 min prolonged the decay of the evoked  
640 eCB transient (n = 5 slices, 1 sample t-test,  $t_{(4)} = 3.164$ ,  $p < 0.05$ ) and increased the  
641 basal fluorescence (n = 6 slices, 1 sample t-test,  $t_{(5)} = 2.535$ ,  $p = 0.052$ ). B) Bath  
642 application of the FAAH inhibitor, URB597, for 75 min had no effect on the decay of the  
643 evoked eCB transient (n = 5 slices, 1 sample t-test,  $t_{(4)} = 2.341$ ,  $p > 0.05$ ) or basal  
644 fluorescence (n = 5 slices, 1 sample t-test,  $t_{(4)} = 1.858$ ,  $p > 0.05$ ). C) The amplitude of

645 evoked eCB transients was reduced by preincubating slices in the DAGL inhibitor,  
646 DO34 (n = 5/6 slices, 2-way RM-ANOVA, Drug:  $F_{(1,9)} = 48.31$ ,  $p < 0.0001$ ; Amplitude:  
647  $F_{(6,54)} = 76.11$ ,  $p < 0.0001$  ; Interaction:  $F_{(6,54)} = 34.23$ ,  $p < 0.0001$ ).

648

649 **Figure 4.** Synaptically evoked 2-AG transients are dependent on metabotropic and  
650 ionotropic glutamate receptors. A) The mGlu5 NAM, MPEP, decreased the peak  
651 amplitude of the 2-AG transient (n = 5 slices, 1-way RM ANOVA, Drug:  $F_{(2,8)} = 12.14$ ,  $p$   
652  $< 0.01$ ). B) The mGlu1 NAM, JNJ'685, decreased the peak amplitude of the 2-AG  
653 transient (n = 5 slices, 1-way RM ANOVA, Drug:  $F_{(2,8)} = 5.531$ ,  $p < 0.05$ ). C) The  
654 mGlu1/5 agonist, (RS)-DHPG, had a biphasic effect on 2-AG production (n = 5 slices, 1-  
655 way RM ANOVA, Drug:  $F_{(2,8)} = 97.33$ ,  $p < 0.0001$ ). D) The AMPAR antagonist, DNQX,  
656 decreased the peak amplitude of the 2-AG transient (n = 5 slices, 1-way RM ANOVA,  
657 Drug:  $F_{(2,8)} = 56.91$ ,  $p < 0.0001$ ). E) The NMDAR antagonist, DL-AP5, decreased the  
658 peak amplitude of the 2-AG transient (n = 4 slices, 1-way RM ANOVA, Drug:  $F_{(2,6)} =$   
659  $58.77$ ,  $p < 0.0001$ ).

660

661 **Figure 5.** Muscarinic M1Rs are required for 2-AG generation evoked by brief synaptic  
662 stimulation. A) The M1R antagonist VU'035, decreased the peak amplitude of the 2-AG  
663 transient (n = 3 slices, 1-way RM ANOVA, Drug:  $F_{(2,4)} = 242.8$ ,  $p < 0.0001$ ). B) The M1R  
664 positive allosteric modulator VU'846 augmented the amplitude of the 2-AG transient (n =  
665 5 slices, 1-way RM ANOVA, Drug:  $F_{(2,8)} = 13.36$ ,  $p < 0.01$ ).

666

667 **Figure 6.** M1Rs and mGlu1/5s trigger 2-AG mobilization through distinct mechanisms  
668 that differentially require ionotropic glutamate receptors. A) Bath application of the  
669 AMPAR antagonist, DNQX, blocks VU'846 augmentation 2-AG production (n = 3 slices,  
670 1-way RM ANOVA, Drug:  $F_{(2,4)} = 685.7$ ,  $p < 0.0001$ ). B) Bath application of the NMDAR  
671 antagonist, DL-AP5, blocks VU'846 augmentation 2-AG production (n = 4 slices, 1-way  
672 RM ANOVA, Drug:  $F_{(2,6)} = 402.3$ ,  $p < 0.0001$ ). C) (RS)-DHPG transiently augments 2-  
673 AG production in the presence of DNQX (n = 3 slices, 1-way RM ANOVA, Drug:  $F_{(2,4)} =$   
674  $52.17$ ,  $p < 0.0001$ ).

675

676 **Figure 7.** D2Rs expressed on CINs inhibit 2-AG production. A) The D2R agonist,  
677 quinpirole, decreased the peak amplitude of the evoked 2-AG transient and the D2R  
678 antagonist, sulpiride, reversed the effect of quinpirole and increased the amplitude of  
679 the 2-AG transient above baseline (n = 5 slices, 1-way RM ANOVA, Drug:  $F_{(2,8)} = 29.59$ ,  
680  $p < 0.001$ ). B) Quinpirole reduced evoked ACh release, as measured with GRAB<sub>ACh3.0</sub>,  
681 which was reversed by sulpiride (n = 4 slices, 1-way RM ANOVA, Drug:  $F_{(2,6)} = 10.99$ ,  $p$   
682  $< 0.01$ ). C) Conditional knockout out of D2Rs on CINs precludes the effects of quinpirole  
683 and sulpiride. (n = 4/5 slices/group, 2-way RM ANOVA, Drug:  $F_{(14,98)} = 10.23$ ,  $p <$   
684  $0.0001$ ; Genotype:  $F_{(1,7)} = 0.7338$ ,  $p < 0.05$ ; Interaction:  $F_{(14,98)} = 15.14$ ,  $p > 0.0001$ ).

685

686 **Figure 8.** Cartoon illustrating the circuit and cellular mechanisms underlying 2-AG  
687 mobilization following brief synaptic stimulation. Our data are consistent with a model in

688 which synaptic stimulation in the DLS generates 2-AG through converging glutamatergic  
689 and cholinergic neurotransmission.

690

691

## 692 **References**

- 693 Ade, K.K., and Lovinger, D.M. (2007). Anandamide regulates postnatal development of long-  
694 term synaptic plasticity in the rat dorsolateral striatum. *J Neurosci* 27, 2403-2409.
- 695 Augustin, S.M., Chancey, J.H., and Lovinger, D.M. (2018). Dual Dopaminergic Regulation of  
696 Corticostriatal Plasticity by Cholinergic Interneurons and Indirect Pathway Medium Spiny  
697 Neurons. *Cell Rep* 24, 2883-2893.
- 698 Bello, E.P., Mateo, Y., Gelman, D.M., Noain, D., Shin, J.H., Low, M.J., Alvarez, V.A.,  
699 Lovinger, D.M., and Rubinstein, M. (2011). Cocaine supersensitivity and enhanced motivation  
700 for reward in mice lacking dopamine D2 autoreceptors. *Nat Neurosci* 14, 1033-1038.
- 701 Brown, S.P., Brenowitz, S.D., and Regehr, W.G. (2003). Brief presynaptic bursts evoke synapse-  
702 specific retrograde inhibition mediated by endogenous cannabinoids. *Nat Neurosci* 6, 1048-1057.
- 703 Calabresi, P., Maj, R., Pisani, A., Mercuri, N.B., and Bernardi, G. (1992). Long-term synaptic  
704 depression in the striatum: physiological and pharmacological characterization. *J Neurosci* 12,  
705 4224-4233.
- 706 Calabresi, P., Picconi, B., Tozzi, A., and Di Filippo, M. (2007). Dopamine-mediated regulation  
707 of corticostriatal synaptic plasticity. *Trends Neurosci* 30, 211-219.
- 708 Calabresi, P., Pisani, A., Mercuri, N.B., and Bernardi, G. (1994). Post-receptor mechanisms  
709 underlying striatal long-term depression. *J Neurosci* 14, 4871-4881.
- 710 Chevaleyre, V., and Castillo, P.E. (2003). Heterosynaptic LTD of hippocampal GABAergic  
711 synapses: a novel role of endocannabinoids in regulating excitability. *Neuron* 38, 461-472.
- 712 Choi, S., and Lovinger, D.M. (1997). Decreased probability of neurotransmitter release underlies  
713 striatal long-term depression and postnatal development of corticostriatal synapses. *Proc Natl*  
714 *Acad Sci U S A* 94, 2665-2670.
- 715 Costa, R.M., Cohen, D., and Nicoletis, M.A. (2004). Differential corticostriatal plasticity during  
716 fast and slow motor skill learning in mice. *Curr Biol* 14, 1124-1134.
- 717 Dong, A., He, K., Dudok, B., Farrell, J.S., Guan, W., Liput, D.J., Puhl, H.L., Cai, R., Duan, J.,  
718 Albarran, E., *et al.* (2020). A fluorescent sensor for spatiotemporally resolved endocannabinoid  
719 dynamics *in vitro* and *in vivo*. *bioRxiv*, 2020.2010.2008.329169.
- 720 Fino, E., Paille, V., Cui, Y., Morera-Herreras, T., Deniau, J.M., and Venance, L. (2010). Distinct  
721 coincidence detectors govern the corticostriatal spike timing-dependent plasticity. *J Physiol* 588,  
722 3045-3062.
- 723 Galante, M., and Diana, M.A. (2004). Group I metabotropic glutamate receptors inhibit GABA  
724 release at interneuron-Purkinje cell synapses through endocannabinoid production. *J Neurosci*  
725 24, 4865-4874.
- 726 Gerdeman, G.L., Ronesi, J., and Lovinger, D.M. (2002). Postsynaptic endocannabinoid release is  
727 critical to long-term depression in the striatum. *Nat Neurosci* 5, 446-451.



728 Giuffrida, A., Parsons, L.H., Kerr, T.M., Rodriguez de Fonseca, F., Navarro, M., and Piomelli,  
729 D. (1999). Dopamine activation of endogenous cannabinoid signaling in dorsal striatum. *Nat*  
730 *Neurosci* 2, 358-363.

731 Gubellini, P., Saulle, E., Centonze, D., Bonsi, P., Pisani, A., Bernardi, G., Conquet, F., and  
732 Calabresi, P. (2001). Selective involvement of mGlu1 receptors in corticostriatal LTD.  
733 *Neuropharmacology* 40, 839-846.

734 Heinbockel, T., Brager, D.H., Reich, C.G., Zhao, J., Muralidharan, S., Alger, B.E., and Kao, J.P.  
735 (2005). Endocannabinoid signaling dynamics probed with optical tools. *J Neurosci* 25, 9449-  
736 9459.

737 Howe, A.R., and Surmeier, D.J. (1995). Muscarinic receptors modulate N-, P-, and L-type Ca<sup>2+</sup>  
738 currents in rat striatal neurons through parallel pathways. *J Neurosci* 15, 458-469.

739 Jing, M., Li, Y., Zeng, J., Huang, P., Skirzewski, M., Kljakic, O., Peng, W., Qian, T., Tan, K.,  
740 Zou, J., *et al.* (2020). An optimized acetylcholine sensor for monitoring in vivo cholinergic  
741 activity. *Nat Methods*.

742 Kano, M. (2014). Control of synaptic function by endocannabinoid-mediated retrograde  
743 signaling. *Proc Jpn Acad Ser B Phys Biol Sci* 90, 235-250.

744 Kim, J., Isokawa, M., Ledent, C., and Alger, B.E. (2002). Activation of muscarinic acetylcholine  
745 receptors enhances the release of endogenous cannabinoids in the hippocampus. *J Neurosci* 22,  
746 10182-10191.

747 Kreitzer, A.C., and Malenka, R.C. (2005). Dopamine modulation of state-dependent  
748 endocannabinoid release and long-term depression in the striatum. *J Neurosci* 25, 10537-10545.

749 Kreitzer, A.C., and Regehr, W.G. (2001). Retrograde inhibition of presynaptic calcium influx by  
750 endogenous cannabinoids at excitatory synapses onto Purkinje cells. *Neuron* 29, 717-727.

751 Kupferschmidt, D.A., and Lovinger, D.M. (2015). Inhibition of presynaptic calcium transients in  
752 cortical inputs to the dorsolateral striatum by metabotropic GABA(B) and mGlu2/3 receptors. *J*  
753 *Physiol* 593, 2295-2310.

754 Lee, S.H., Foldy, C., and Soltesz, I. (2010). Distinct endocannabinoid control of GABA release  
755 at perisomatic and dendritic synapses in the hippocampus. *J Neurosci* 30, 7993-8000.

756 Lee, S.H., Ledri, M., Toth, B., Marchionni, I., Henstridge, C.M., Dudok, B., Kenesei, K., Barna,  
757 L., Szabo, S.I., Renkecz, T., *et al.* (2015). Multiple Forms of Endocannabinoid and  
758 Endovanilloid Signaling Regulate the Tonic Control of GABA Release. *J Neurosci* 35, 10039-  
759 10057.

760 Lerner, T.N., and Kreitzer, A.C. (2012). RGS4 is required for dopaminergic control of striatal  
761 LTD and susceptibility to parkinsonian motor deficits. *Neuron* 73, 347-359.

762 Liang, R., Broussard, G.J., and Tian, L. (2015). Imaging chemical neurotransmission with  
763 genetically encoded fluorescent sensors. *ACS Chem Neurosci* 6, 84-93.

764 Lovinger, D.M. (2008). Presynaptic modulation by endocannabinoids. *Handb Exp Pharmacol*,  
765 435-477.

766 Maejima, T., Hashimoto, K., Yoshida, T., Aiba, A., and Kano, M. (2001). Presynaptic inhibition  
767 caused by retrograde signal from metabotropic glutamate to cannabinoid receptors. *Neuron* 31,  
768 463-475.

769 Maejima, T., Oka, S., Hashimotodani, Y., Ohno-Shosaku, T., Aiba, A., Wu, D., Waku, K.,  
770 Sugiura, T., and Kano, M. (2005). Synaptically driven endocannabinoid release requires Ca<sup>2+</sup>-  
771 assisted metabotropic glutamate receptor subtype 1 to phospholipase C $\beta$ 4 signaling cascade in  
772 the cerebellum. *J Neurosci* 25, 6826-6835.

773 Mathur, B.N., and Lovinger, D.M. (2012). Endocannabinoid-dopamine interactions in striatal  
774 synaptic plasticity. *Front Pharmacol* 3, 66.

775 Mizuno, G.O., Unger, E.K., and Tian, L. (2019). Real Time Monitoring of Neuromodulators in  
776 Behaving Animals Using Genetically Encoded Indicators. In *Compendium of In Vivo*  
777 *Monitoring in Real-Time Molecular Neuroscience*, pp. 1-18.

778 Narushima, M., Uchigashima, M., Fukaya, M., Matsui, M., Manabe, T., Hashimoto, K.,  
779 Watanabe, M., and Kano, M. (2007). Tonic enhancement of endocannabinoid-mediated  
780 retrograde suppression of inhibition by cholinergic interneuron activity in the striatum. *J*  
781 *Neurosci* 27, 496-506.

782 Neu, A., Foldy, C., and Soltesz, I. (2007). Postsynaptic origin of CB1-dependent tonic inhibition  
783 of GABA release at cholecystikinin-positive basket cell to pyramidal cell synapses in the CA1  
784 region of the rat hippocampus. *J Physiol* 578, 233-247.

785 Ohno-Shosaku, T., Maejima, T., and Kano, M. (2001). Endogenous cannabinoids mediate  
786 retrograde signals from depolarized postsynaptic neurons to presynaptic terminals. *Neuron* 29,  
787 729-738.

788 Patel, S., Rademacher, D.J., and Hillard, C.J. (2003). Differential regulation of the  
789 endocannabinoids anandamide and 2-arachidonylglycerol within the limbic forebrain by  
790 dopamine receptor activity. *J Pharmacol Exp Ther* 306, 880-888.

791 Patriarchi, T., Cho, J.R., Merten, K., Howe, M.W., Marley, A., Xiong, W.H., Folk, R.W.,  
792 Broussard, G.J., Liang, R., Jang, M.J., *et al.* (2018). Ultrafast neuronal imaging of dopamine  
793 dynamics with designed genetically encoded sensors. *Science* 360.

794 Perez-Burgos, A., Perez-Rosello, T., Salgado, H., Flores-Barrera, E., Prieto, G.A., Figueroa, A.,  
795 Galarraga, E., and Vargas, J. (2008). Muscarinic M(1) modulation of N and L types of calcium  
796 channels is mediated by protein kinase C in neostriatal neurons. *Neuroscience* 155, 1079-1097.

797 Ravotto, L., Duffet, L., Zhou, X., Weber, B., and Patriarchi, T. (2020). A Bright and Colorful  
798 Future for G-Protein Coupled Receptor Sensors. *Front Cell Neurosci* 14, 67.

799 Ronesi, J., Gerdeman, G.L., and Lovinger, D.M. (2004). Disruption of endocannabinoid release  
800 and striatal long-term depression by postsynaptic blockade of endocannabinoid membrane  
801 transport. *J Neurosci* 24, 1673-1679.

802 Ronesi, J., and Lovinger, D.M. (2005). Induction of striatal long-term synaptic depression by  
803 moderate frequency activation of cortical afferents in rat. *J Physiol* 562, 245-256.

804 Sgobio, C., Kupferschmidt, D.A., Cui, G., Sun, L., Li, Z., Cai, H., and Lovinger, D.M. (2014).  
805 Optogenetic measurement of presynaptic calcium transients using conditional genetically  
806 encoded calcium indicator expression in dopaminergic neurons. *PLoS One* 9, e111749.

807 Strobel, B., Miller, F.D., Rist, W., and Lamla, T. (2015). Comparative Analysis of Cesium  
808 Chloride- and Iodixanol-Based Purification of Recombinant Adeno-Associated Viral Vectors for  
809 Preclinical Applications. *Hum Gene Ther Methods* 26, 147-157.

810 Sun, F., Zeng, J., Jing, M., Zhou, J., Feng, J., Owen, S.F., Luo, Y., Li, F., Wang, H., Yamaguchi,  
811 T., *et al.* (2018). A Genetically Encoded Fluorescent Sensor Enables Rapid and Specific  
812 Detection of Dopamine in Flies, Fish, and Mice. *Cell* 174, 481-496 e419.

813 Sung, K.W., Choi, S., and Lovinger, D.M. (2001). Activation of group I mGluRs is necessary for  
814 induction of long-term depression at striatal synapses. *J Neurophysiol* 86, 2405-2412.

815 Uchigashima, M., Narushima, M., Fukaya, M., Katona, I., Kano, M., and Watanabe, M. (2007).  
816 Subcellular arrangement of molecules for 2-arachidonoyl-glycerol-mediated retrograde signaling  
817 and its physiological contribution to synaptic modulation in the striatum. *J Neurosci* 27, 3663-  
818 3676.

- 819 Ueda, N., Tsuboi, K., and Uyama, T. (2013). Metabolism of endocannabinoids and related N-  
820 acylethanolamines: canonical and alternative pathways. *FEBS J* 280, 1874-1894.
- 821 Wang, H., Jing, M., and Li, Y. (2018). Lighting up the brain: genetically encoded fluorescent  
822 sensors for imaging neurotransmitters and neuromodulators. *Curr Opin Neurobiol* 50, 171-178.
- 823 Wang, W., Dever, D., Lowe, J., Storey, G.P., Bhansali, A., Eck, E.K., Nitulescu, I., Weimer, J.,  
824 and Bamford, N.S. (2012). Regulation of prefrontal excitatory neurotransmission by dopamine in  
825 the nucleus accumbens core. *J Physiol* 590, 3743-3769.
- 826 Wang, Z., Kai, L., Day, M., Ronesi, J., Yin, H.H., Ding, J., Tkatch, T., Lovinger, D.M., and  
827 Surmeier, D.J. (2006). Dopaminergic control of corticostriatal long-term synaptic depression in  
828 medium spiny neurons is mediated by cholinergic interneurons. *Neuron* 50, 443-452.
- 829 Wilson, R.I., and Nicoll, R.A. (2001). Endogenous cannabinoids mediate retrograde signalling at  
830 hippocampal synapses. *Nature* 410, 588-592.
- 831 Xiao, X., Li, J., and Samulski, R.J. (1998). Production of high-titer recombinant adeno-  
832 associated virus vectors in the absence of helper adenovirus. *J Virol* 72, 2224-2232.
- 833 Yin, H.H., Davis, M.I., Ronesi, J.A., and Lovinger, D.M. (2006). The role of protein synthesis in  
834 striatal long-term depression. *J Neurosci* 26, 11811-11820.
- 835 Yin, H.H., and Lovinger, D.M. (2006). Frequency-specific and D2 receptor-mediated inhibition  
836 of glutamate release by retrograde endocannabinoid signaling. *Proc Natl Acad Sci U S A* 103,  
837 8251-8256.
- 838

Figure 1

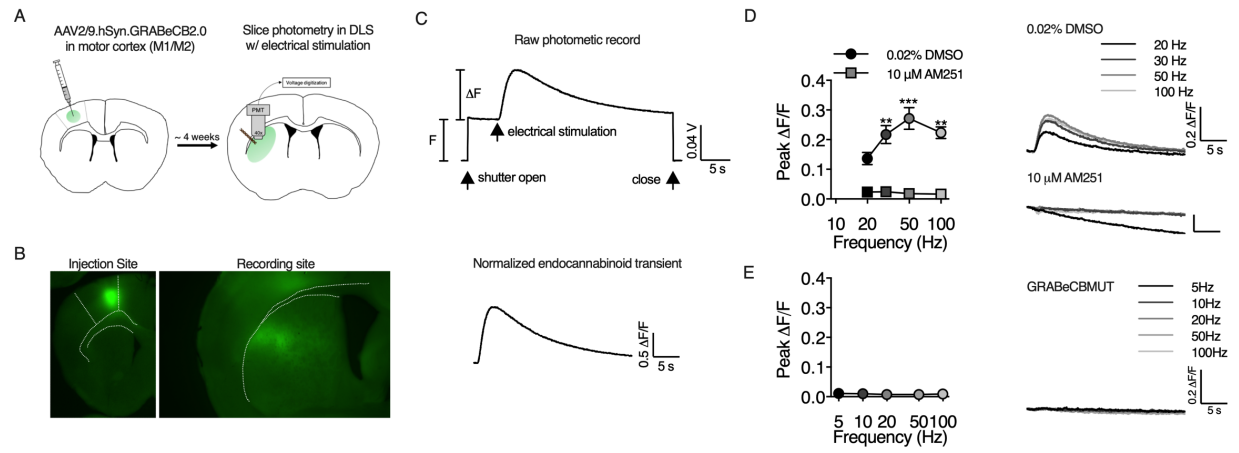

Figure 2

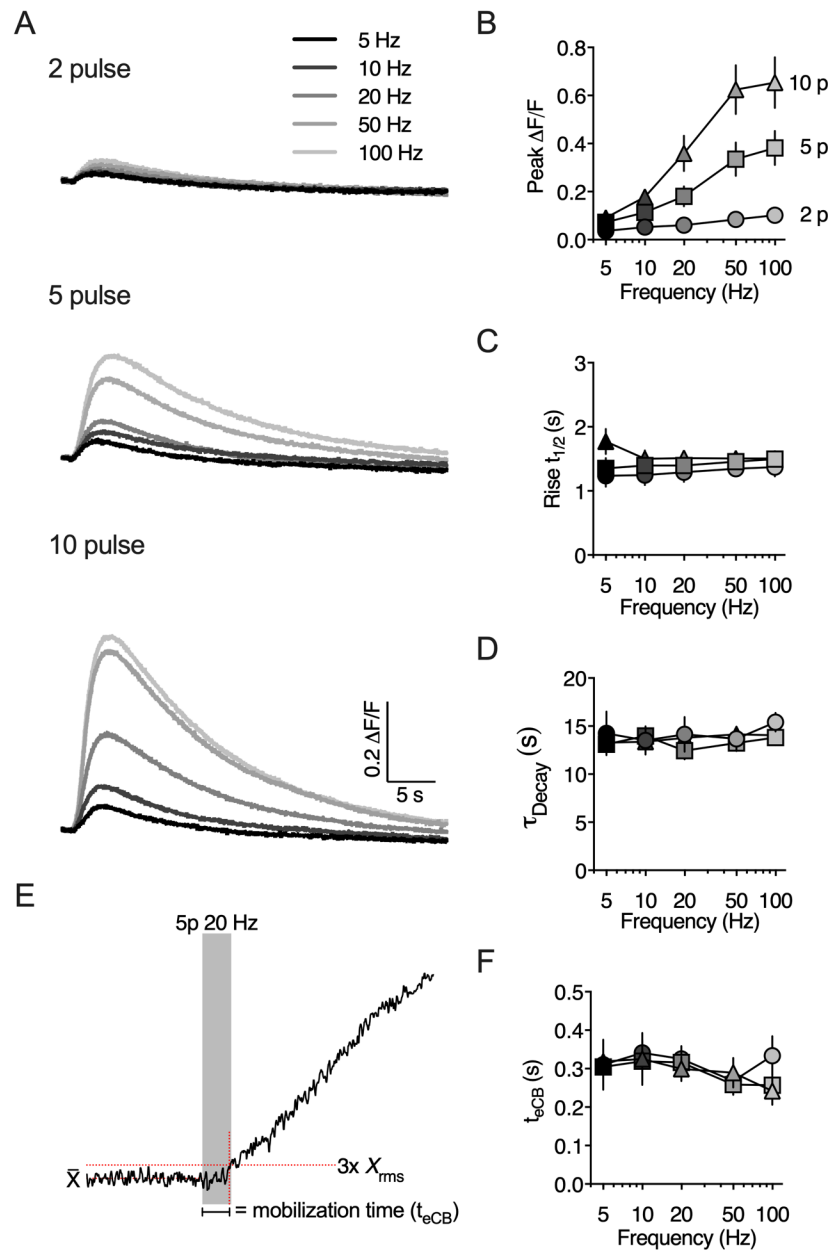

Figure 3

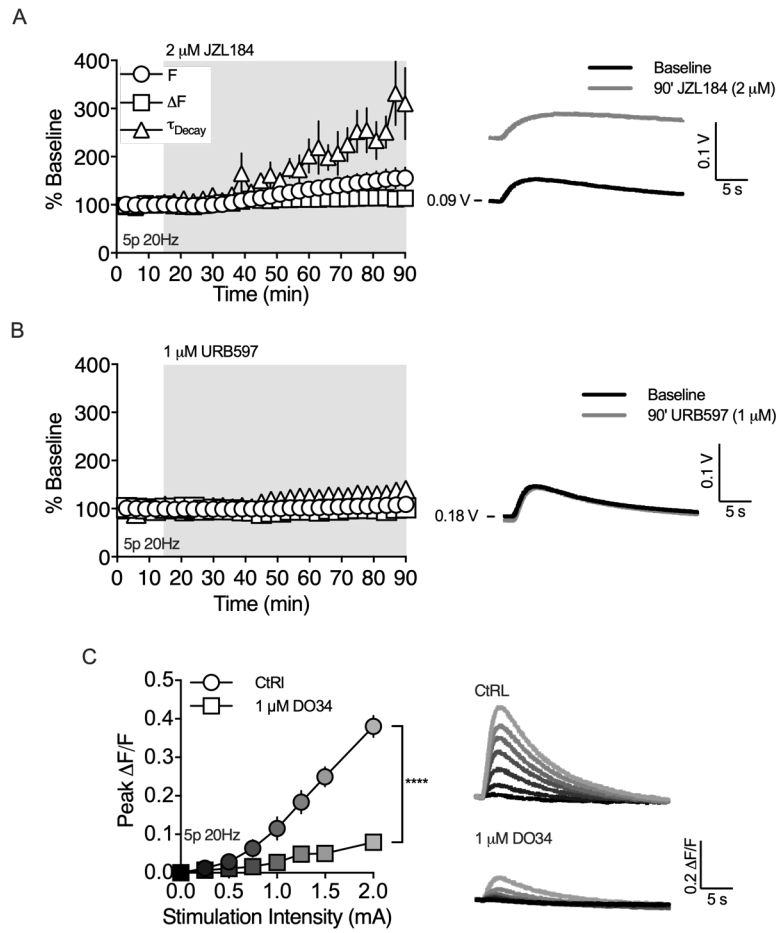

Figure 4

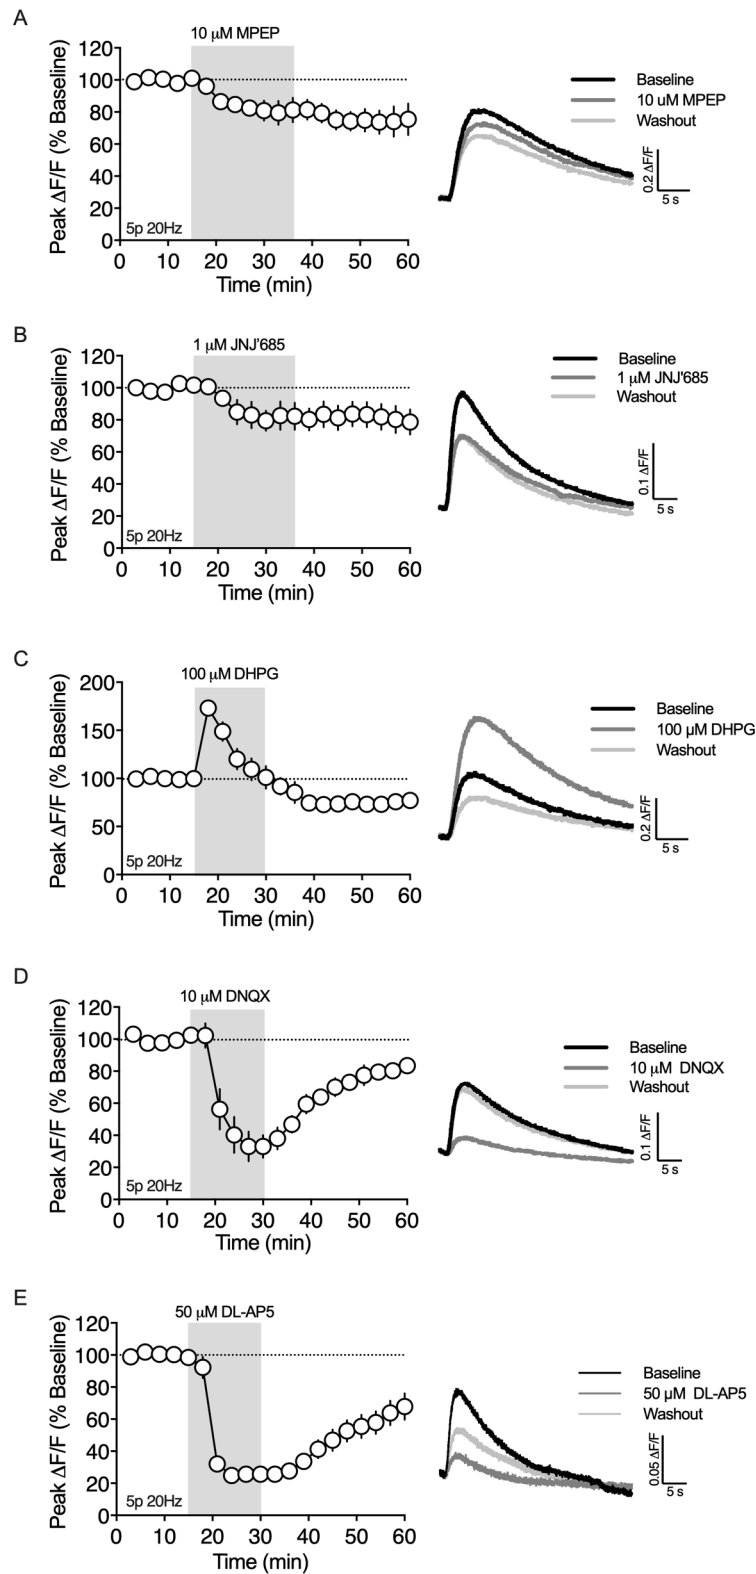

Figure 5

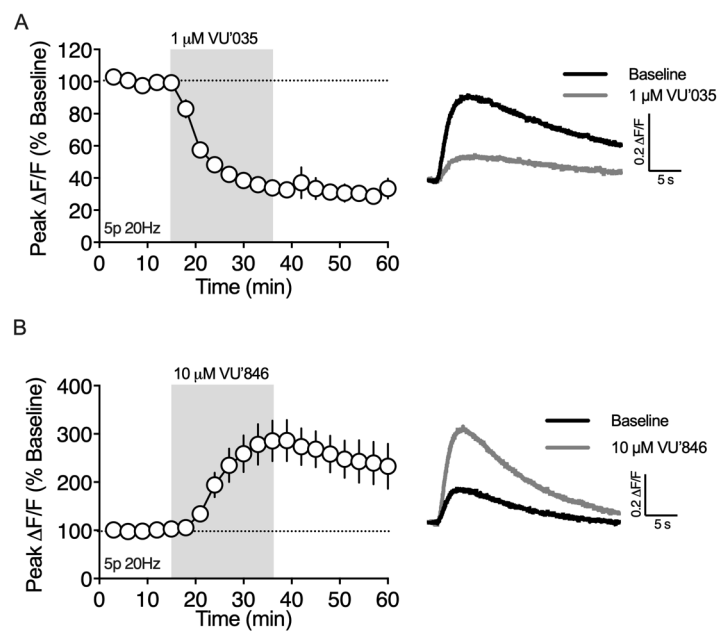



Figure 6

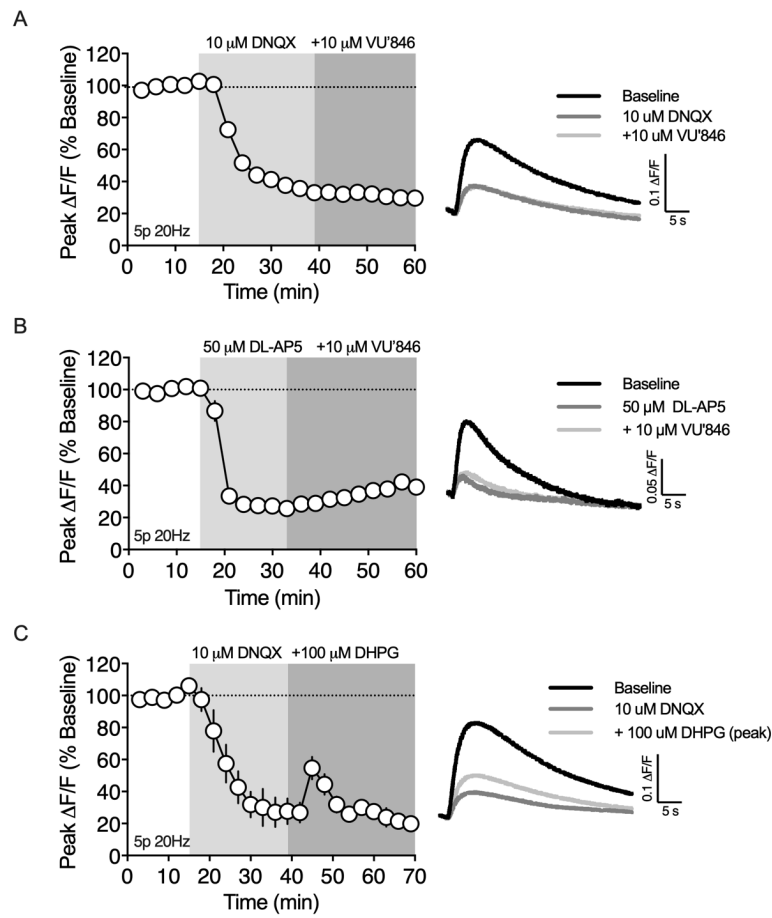

Figure 7

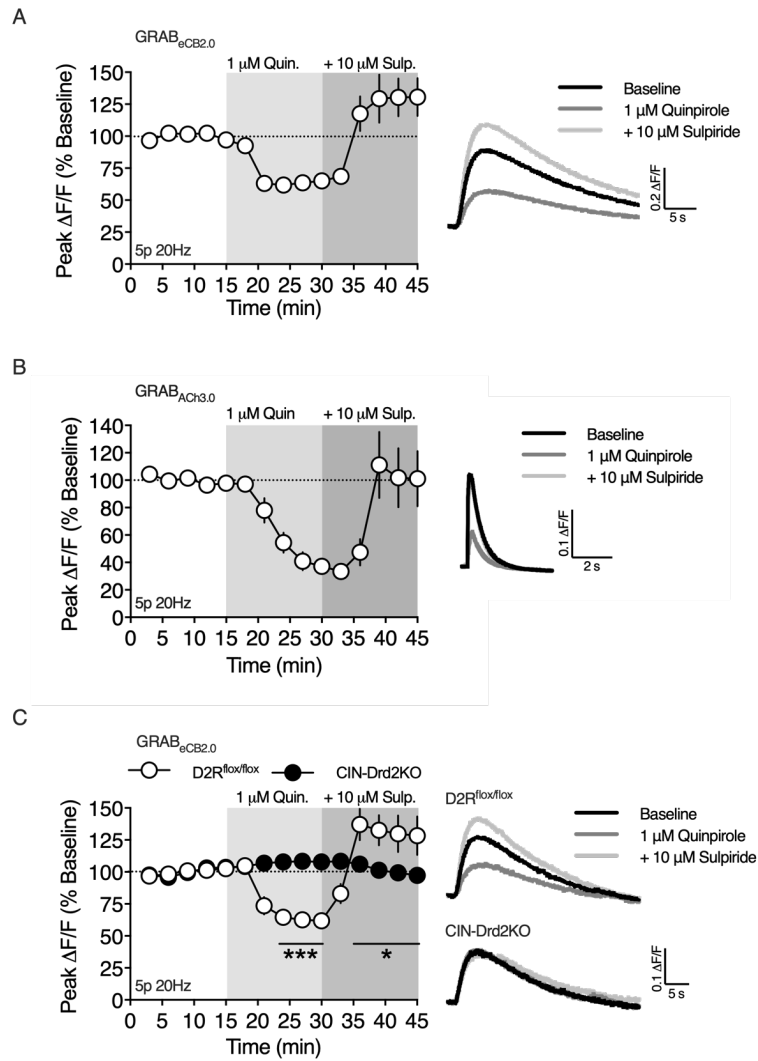

Figure 8

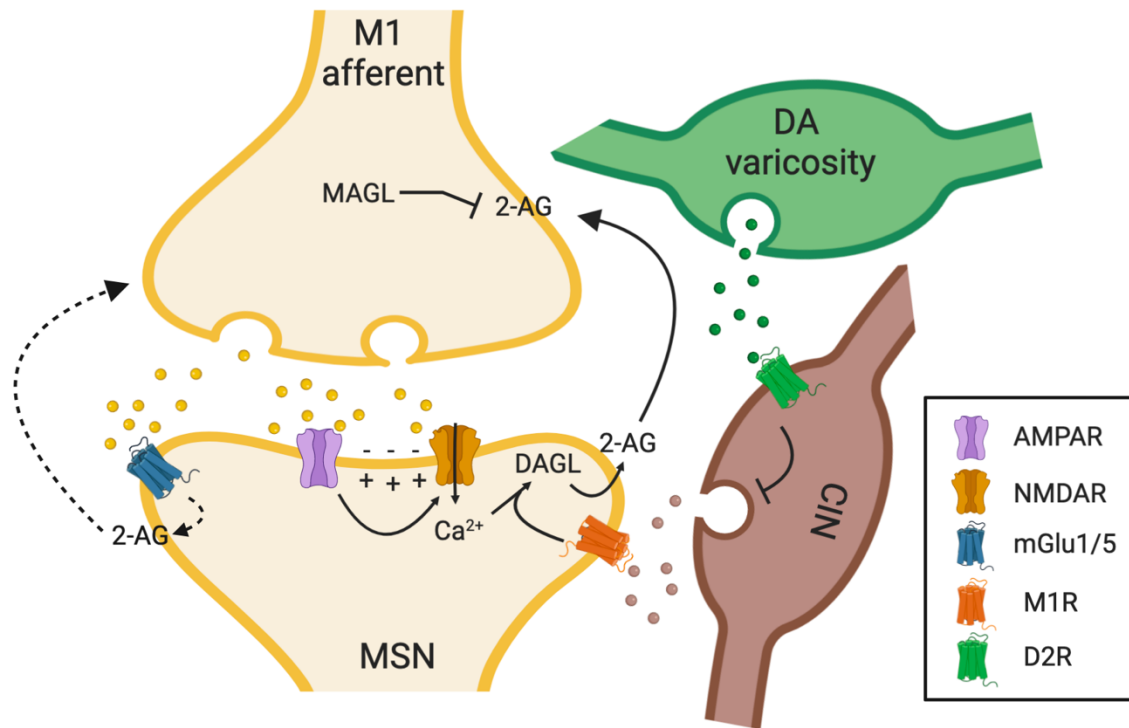

Source: https://biorxiv.org/content/10.1101/2020.10.21.348995v1.full.pdf
